# Supplementary material for: Assessment of Neonatal Thermal Cares: Practices and Beliefs Among Rural Women in West Guji Zone, South Ethiopia: A Cross-Sectional Study
Source: Research Square preprint supplement (doi:10.21203/rs.3.rs-114069/v1), 2020-12-03
Supplement: Supplementary file 2 [file 9aa580e3f9d2af55fa4e93a9.docx]

**Assessment of Neonatal Thermal: Practices and beliefs among Rural Women in West Guji Zone, South Ethiopia, 2019.**

**IDI guide (English Version)**

**Grandmothers and Traditional birth attendants**

- - 1. Do you think newborns should be kept warm after delivery? Why?
    2. How do you (Grandmothers and traditional birth attendants) usually advise local women to keep their newborn warm after delivery? Why you advise the way you mention?

(Probe: cultural beliefs behind advice, health benefits, social benefits and etc. )

- - 1. What do you think are benefits of keeping newborns warm?

(Probe: health benefits, cultural benefits,etc…)

- - 1. How newborn are kept warm after delivery in your area?

(Probe: Home preparation, bathing, breast feeding initiation, early warping and early drying, skin-to-skin contact, head covering and etc.)

- - 1. How commonly women in your area wrap and dry their newborns immediately after delivery?

1. Do you think early wrapping and drying of newborn is helpful? If yes, Why? If no, why?
2. When should newborn be dried and wrapped after delivery? (probe: immediately, delay after X hours)
3. What maternal, newborns, culturally, socio-economic and demographic factors affect early wrapping and drying of newborns in your area?
4. Do local women usually prepare something like clothes for wrapping and drying of newborns after delivery?
5. Why local women may not early dry and wrap their newborns after delivery?
6. Do you think early wrapping and drying helps to keep newborns warm? How?
7. How local women perceive early drying and wrapping of newborns?
   - 1. How commonly women in your area cover head of newborns immediately after delivery?
8. Do you think early head covering of newborn is helpful? If yes, Why? If no, why?
9. When should newborn be head covered after delivery? (probe: immediately, delay after X hours)
10. What maternal, newborns, culturally, socio-economic and demographic factors affect head covering of newborns in your area?
11. Do local women usually prepare something like clothes/cape for wrapping and drying of newborns after delivery?
12. Why local women may not cover head of their newborns after delivery?
13. Do you think head covering helps to keep newborns warm? How?
14. How local women perceive head covering of newborns?
    - 1. How commonly women in your area practice skin-to-skin care for newborns immediately after delivery? [**Show picture**]
    1. Do you think skin-to-skin care of newborn is helpful? If yes, Why? If no, why?
    2. What maternal, newborns, culturally, health care socio-economic and demographic factors affect skin-to-skin care of newborns in your area?
    3. Why local women may not do skin-to-skin care for their newborns after delivery?
    4. Do you think skin-to-skin care helps to keep newborns warm? How?
    5. How local women perceive practicing skin-to-skin care of newborns?
       1. When commonly newborns are bathed immediately after delivery in your area? (Probe: immediately, after X hours of delivery)? Why?
15. When is appropriate time of newborn bath after delivery? Why that time?
16. When after delivery you usually advise local women to bath their newborn?(Probe: immediately, after x hours and etc...) Why?
17. Do you think initial bathing of newborns has its own effects on newborn temperature? If yes, Why? If no why?
18. Do you think delaying initial bathing of newborns is helpful to keep newborns warm? If yes, Why? If no why?
19. What are advantages and disadvantages of immediately bathing of newborn?

(Probe: health, cultural, social and etc…benefits)

1. What are advantages and disadvantages of delay bathing of newborn at least by 6 hours after delivery?

(Probe: health, cultural, social and etc…benefits)

1. What are advantages and disadvantages of delay bathing of newborn at least by 24 hours after delivery?

(Probe: health, cultural, social and etc…benefits)

1. How do local women perceive delayed bathing of newborns at least by 6/24 hours after delivery?
2. What maternal, newborns, culturally, health care socio-economic and demographic factors affect delay bathing of newborns in your area?
3. Why local women may want to bath their newborns immediately after delivery?
   - 1. When commonly newborns are breastfed after delivery in your area? (Probe: immediately, after X hours of delivery)? Why?
   1. When is appropriate of giving first breast milk to newborn after delivery? Why that time?
   2. When after delivery do you usually advise local women to initiate breast feeding?
   3. Do you think early breastfeeding of newborns has its own effects on newborn temperature? If yes, Why? If no, why?
   4. Do you think early initiation of breastfeeding within one hour of delivery is helpful to keep newborns warm? If yes, Why? If no why?
   5. What are advantages and disadvantages of early initiation (i.e within one hour) of breastfeeding of newborn?

(Probe: health, cultural, social and etc…benefits)

- 1. What are advantages and disadvantages of giving first breast milk to newborns?

(Probe: health, cultural, social and etc…benefits)

- 1. What do local women do with first breast milk? (Probe: discard? Why. Give to newborn and etc…)
  2. What do you usually advise local women to do with first breast milk? (Probe: discard? Why. Give to newborn and etc…)
  3. How do local women perceive early initiation of breastfeeding within one hour of delivery?
  4. How do local women perceive giving first breast milk to newborn?
  5. What maternal, newborns, culturally, health care socio-economic and demographic factors affect early initiation of breastfeeding in your area?
  6. Do local women provide extra foods and fluids to newborns during first months of delivery? (Why? Why not?)
  7. Do you think exclusively and frequently breast feeding of newborn within first month of delivery helps to keep baby warm?
